# Supplementary material
Source: publisher figshare collection journal article supplement (https://karger.figshare.com/articles/dataset/_/5450272)
Supplement: Supplementary file 1 [file 1]

**Supplementary Table 1:** Demographics and neurological characteristics in patients with or without PFO in cryptogenic stroke

|                                                                                                                            | <b>PFO<br/>(n=134)</b> | <b>No PFO<br/>(n=300)</b> | <b>RR (95% CI)*</b> | <b>P-value</b> |
|----------------------------------------------------------------------------------------------------------------------------|------------------------|---------------------------|---------------------|----------------|
| Age (median + interquartile range in years)                                                                                | 58 (48-70)             | 60 (51-71)                | 0.97 (0.92-1.02)    | 0.228          |
| History of smoking                                                                                                         | 35 (26.1%)             | 101 (33.7%)               | 0.78 (0.56-1.07)    | 0.117          |
| Hypertension                                                                                                               | 65 (48.5%)             | 179 (59.7%)               | 0.81 (0.66-0.99)    | 0.030          |
| Hyperlipidemia                                                                                                             | 37 (27.6%)             | 97 (32.3%)                | 0.85 (0.62-1.18)    | 0.325          |
| Diabetes mellitus                                                                                                          | 2 (1.5%)               | 3 (1.0%)                  | 1.49 (0.25-8.83)    | 0.657          |
| Known atrial fibrillation                                                                                                  | 0 (0.0%)               | 0 (0.0%)                  | -                   | -              |
| Newly detected atrial fibrillation                                                                                         | 0 (0.0%)               | 0 (0.0%)                  | -                   | -              |
| Body mass index (median + interquartile range in kg/m <sup>2</sup> )                                                       | 26 (23-30)             | 26 (24-28)                | 1.02 (0.98-1.06)    | 0.716          |
| NHSS admission (median + interquartile range)                                                                              | 2 (0-5)                | 2 (0-5)                   | 1.02 (0.80-1.29)    | 0.895          |
| NHSS discharge (median + interquartile range)                                                                              | 1 (0-3)                | 1 (0-3)                   | 0.93 (0.72-1.20)    | 0.576          |
| TIA                                                                                                                        | 35 (26.1%)             | 79 (26.3%)                | 0.99 (0.70-1.40)    | 0.963          |
| Anterior infarction                                                                                                        | 6 (4.5%)               | 16 (5.3%)                 | 0.84 (0.34-2.10)    | 0.707          |
| Media infarction                                                                                                           | 85 (63.4%)             | 172 (57.3%)               | 1.11 (0.94-1.30)    | 0.232          |
| Posterior infarction                                                                                                       | 33 (24.6 %)            | 89 (29.7 %)               | 0.83 (0.59-1.17)    | 0.281          |
| PFO: Patent foramen ovale<br>RR: Risk ratio<br>CI: Confidence Intervall<br>NHSS: National Institute of Health Stroke Score |                        |                           |                     |                |

\* Risk ratio with 95% confidence interval for the comparison PFO vs no PFO; for continuous variables geometric mean ratios are report; for NIHSS scores incidence rate ratios obtained via negative binomial regressions are reported.
