# Supplementary material
Source: publisher figshare collection journal article supplement (https://karger.figshare.com/articles/dataset/_/5450272)
Supplement: Supplementary file 2 [file 1]

**Supplementary Table 2:** Demographics and neurological characteristics in patients with PFO with or without ASA in cryptogenic stroke

|                                                                                                                            | <b>PFO with ASA<br/>(n=53)</b> | <b>PFO without ASA<br/>(n=81)</b> | <b>RR (95% CI)*</b> | <b>P-value</b> |
|----------------------------------------------------------------------------------------------------------------------------|--------------------------------|-----------------------------------|---------------------|----------------|
| Age (median + interquartile range in years)                                                                                | 59 (47-72)                     | 57 (48-69)                        | 1.04 (0.95-1.15)    | 0.333          |
| History of smoking                                                                                                         | 13 (24.5%)                     | 22 (27.2%)                        | 0.90 (0.50-1.63)    | 0.734          |
| Hypertension                                                                                                               | 25 (47.2%)                     | 40 (49.4%)                        | 0.96 (0.67-1.37)    | 0.802          |
| Hyperlipidemia                                                                                                             | 14 (26.4%)                     | 23 (28.4%)                        | 0.93 (0.53-1.64)    | 0.802          |
| Diabetes mellitus                                                                                                          | 0 (0.0%)                       | 2 (2.5%)                          | -                   | 0.249          |
| Known atrial fibrillation                                                                                                  | 0 (0.0%)                       | 0 (0.0%)                          | -                   | -              |
| Newly detected atrial fibrillation                                                                                         | 0 (0.0%)                       | 0 (0.0%)                          | -                   | -              |
| Body mass index (median + interquartile range in kg/m <sup>2</sup> )                                                       | 25 (23-29)                     | 26 (23-30)                        | 0.99 (0.92-1.06)    | 0.474          |
| NHSS admission (median + interquartile range)                                                                              | 2 (0-5)                        | 1 (0-5)                           | 1.18 (0.79-1.78)    | 0.420          |
| NHSS discharge (median + interquartile range)                                                                              | 1 (0-3)                        | 1 (0-3)                           | 1.07 (0.69-1.66)    | 0.858          |
| TIA                                                                                                                        | 14 (26.4%)                     | 21 (25.9%)                        | 1.02 (0.57-1.82)    | 0.950          |
| Anterior infarction                                                                                                        | 4 (7.5%)                       | 2 (2.5%)                          | 3.06 (0.58-16.10)   | 0.165          |
| Media infarction                                                                                                           | 32 (60.4%)                     | 53 (65.4%)                        | 0.92 (0.70-1.20)    | 0.552          |
| Posterior infarction                                                                                                       | 12 (22.6%)                     | 21 (25.9%)                        | 0.87 (0.47-1.62)    | 0.666          |
| PFO: Patent foramen ovale<br>NHSS: National Institute of Health Stroke Score<br>RR: Risk ratio<br>CI: Confidence Intervall |                                |                                   |                     |                |

\* Risk ratio with 95% confidence interval for the comparison PFO with ASA vs PFO without ASA; for continuous variables geometric mean ratios are report; for NIHSS scores incidence rate ratios obtained via negative binomial regressions are reported.
